# Supplementary material for: Whole-Genome Analysis of Multienvironment or Multitrait QTL in MAGIC
Source: PubMed Central journal article supplement (PMC4169149; doi:10.1534/g3.114.012971), 2014-09-01
Supplement: supp_4.9.1569_TableS1.pdf [file supp_4.9.1569_TableS1.pdf]

**Table S1 MPWGAIM QTL analysis of hectolitre weight**

| Chromosome | dist (cM) | dist (cM) | Founder  | Size   | Founder Prob | Founder LOGP | Prob  | % var | LOGP |
|------------|-----------|-----------|----------|--------|--------------|--------------|-------|-------|------|
| 1A         | 32.05     | 32.55     | Yitpi    | -0.022 | 0.448        | 0.35         | 0.008 | 1.5   | 2.08 |
|            |           |           | Chara    | -0.351 | 0.023        | 1.65         |       |       |      |
|            |           |           | Baxter   | 0.178  | 0.152        | 0.82         |       |       |      |
|            |           |           | Westonia | 0.179  | 0.151        | 0.82         |       |       |      |
| 1A         | 156.36    | 159.45    | Yitpi    | -0.113 | 0.236        | 0.63         | 0.047 | 0.9   | 1.33 |
|            |           |           | Chara    | 0.254  | 0.046        | 1.34         |       |       |      |
|            |           |           | Baxter   | 0.027  | 0.429        | 0.37         |       |       |      |
|            |           |           | Westonia | -0.179 | 0.12         | 0.92         |       |       |      |
| 1B         | 124.79    | 126.83    | Yitpi    | -0.539 | 0.009        | 2.07         | 0     | 3.3   | 3.74 |
|            |           |           | Chara    | 0.301  | 0.092        | 1.04         |       |       |      |
|            |           |           | Baxter   | 0.083  | 0.36         | 0.44         |       |       |      |
|            |           |           | Westonia | 0.125  | 0.288        | 0.54         |       |       |      |
| 1D         | 114.95    | 115.96    | Yitpi    | -0.252 | 0.069        | 1.16         | 0.003 | 1.6   | 2.5  |
|            |           |           | Chara    | 0.033  | 0.427        | 0.37         |       |       |      |
|            |           |           | Baxter   | -0.119 | 0.275        | 0.56         |       |       |      |
|            |           |           | Westonia | 0.322  | 0.036        | 1.44         |       |       |      |
| 2A         | 303.23    | 303.73    | Yitpi    | 0.176  | 0.102        | 0.99         | 0.062 | 0.8   | 1.21 |
|            |           |           | Chara    | 0.036  | 0.4          | 0.4          |       |       |      |
|            |           |           | Baxter   | -0.22  | 0.052        | 1.29         |       |       |      |
|            |           |           | Westonia | -0.001 | 0.499        | 0.3          |       |       |      |
| 2B         | 81.9      | 82.4      | Yitpi    | 0.367  | 0.036        | 1.44         | 0.019 | 1.6   | 1.72 |
|            |           |           | Chara    | -0.291 | 0.105        | 0.98         |       |       |      |
|            |           |           | Baxter   | -0.002 | 0.497        | 0.3          |       |       |      |
|            |           |           | Westonia | -0.096 | 0.321        | 0.49         |       |       |      |
| 2B         | 321.49    | 323.01    | Yitpi    | 0.568  | 0.058        | 1.24         | 0     | 13.7  | 6.39 |
|            |           |           | Chara    | -0.903 | 0.015        | 1.82         |       |       |      |
|            |           |           | Baxter   | 0.642  | 0.068        | 1.17         |       |       |      |
|            |           |           | Westonia | -0.425 | 0.126        | 0.9          |       |       |      |
| 2D         | 62.8      | 80.63     | Yitpi    | -0.222 | 0.165        | 0.78         | 0     | 3.1   | 3.39 |
|            |           |           | Chara    | 0.494  | 0.012        | 1.93         |       |       |      |
|            |           |           | Baxter   | -0.256 | 0.133        | 0.88         |       |       |      |
|            |           |           | Westonia | -0.044 | 0.423        | 0.37         |       |       |      |
| 3B         | 97.29     | 97.79     | Yitpi    | 0.312  | 0.074        | 1.13         | 0.024 | 1.6   | 1.61 |
|            |           |           | Chara    | -0.107 | 0.329        | 0.48         |       |       |      |
|            |           |           | Baxter   | -0.304 | 0.057        | 1.25         |       |       |      |
|            |           |           | Westonia | 0.079  | 0.371        | 0.43         |       |       |      |
| 4B         | 25.22     | 25.72     | Yitpi    | 0.08   | 0.305        | 0.52         | 0.043 | 0.9   | 1.37 |
|            |           |           | Chara    | -0.167 | 0.181        | 0.74         |       |       |      |
|            |           |           | Baxter   | 0.23   | 0.072        | 1.14         |       |       |      |
|            |           |           | Westonia | -0.154 | 0.174        | 0.76         |       |       |      |
| 4D         | 18        | 20.04     | Yitpi    | 0.327  | 0.026        | 1.59         | 0.022 | 1.1   | 1.67 |
|            |           |           | Chara    | -0.176 | 0.138        | 0.86         |       |       |      |
|            |           |           | Baxter   | -0.056 | 0.368        | 0.43         |       |       |      |
|            |           |           | Westonia | -0.109 | 0.263        | 0.58         |       |       |      |
| 5A         | 241.75    | 245.09    | Yitpi    | -0.216 | 0.137        | 0.86         | 0.001 | 2.1   | 3.08 |
|            |           |           | Chara    | -0.317 | 0.05         | 1.3          |       |       |      |
|            |           |           | Baxter   | 0.305  | 0.07         | 1.15         |       |       |      |
|            |           |           | Westonia | 0.205  | 0.144        | 0.84         |       |       |      |
| 5A         | 321.45    | 324.54    | Yitpi    | -0.261 | 0.064        | 1.2          | 0.037 | 1.3   | 1.43 |
|            |           |           | Chara    | -0.119 | 0.274        | 0.56         |       |       |      |
|            |           |           | Baxter   | 0.122  | 0.278        | 0.56         |       |       |      |
|            |           |           | Westonia | 0.243  | 0.096        | 1.02         |       |       |      |
| 5B         | 191.23    | 191.73    | Yitpi    | 0.111  | 0.265        | 0.58         | 0.053 | 1.1   | 1.27 |
|            |           |           | Chara    | -0.29  | 0.058        | 1.24         |       |       |      |
|            |           |           | Baxter   | 0.189  | 0.156        | 0.81         |       |       |      |
|            |           |           | Westonia | -0.025 | 0.461        | 0.34         |       |       |      |
| 6A         | 227.37    | 228.38    | Yitpi    | -0.264 | 0.066        | 1.18         | 0.039 | 1.1   | 1.41 |
|            |           |           | Chara    | 0.267  | 0.097        | 1.01         |       |       |      |
|            |           |           | Baxter   | -0.112 | 0.266        | 0.58         |       |       |      |
|            |           |           | Westonia | 0.093  | 0.294        | 0.53         |       |       |      |
| 6B         | 175.44    | 175.95    | Yitpi    | 0.299  | 0.042        | 1.38         | 0.061 | 1.1   | 1.21 |
|            |           |           | Chara    | -0.094 | 0.329        | 0.48         |       |       |      |
|            |           |           | Baxter   | -0.043 | 0.406        | 0.39         |       |       |      |
|            |           |           | Westonia | -0.176 | 0.154        | 0.81         |       |       |      |
| 7A         | 161.15    | 161.66    | Yitpi    | -0.158 | 0.206        | 0.69         | 0.003 | 1.9   | 2.47 |
|            |           |           | Chara    | 0.13   | 0.247        | 0.61         |       |       |      |
|            |           |           | Baxter   | 0.314  | 0.043        | 1.36         |       |       |      |
|            |           |           | Westonia | -0.305 | 0.057        | 1.24         |       |       |      |
| 7A         | 353.95    | 355.47    | Yitpi    | -0.078 | 0.317        | 0.5          | 0.149 | 0.5   | 0.83 |
|            |           |           | Chara    | -0.008 | 0.478        | 0.32         |       |       |      |
|            |           |           | Baxter   | -0.138 | 0.19         | 0.72         |       |       |      |
|            |           |           | Westonia | 0.216  | 0.064        | 1.19         |       |       |      |
| 7D         | 74.93     | 81.32     | Yitpi    | 0.092  | 0.318        | 0.5          | 0.257 | 0.5   | 0.59 |
|            |           |           | Chara    | -0.003 | 0.494        | 0.31         |       |       |      |
|            |           |           | Baxter   | -0.202 | 0.087        | 1.06         |       |       |      |
|            |           |           | Westonia | 0.104  | 0.295        | 0.53         |       |       |      |
| Unlinked3  | 4.06      | 7.69      | Yitpi    | -0.22  | 0.086        | 1.07         | 0.123 | 0.7   | 0.91 |
|            |           |           | Chara    | 0.024  | 0.454        | 0.34         |       |       |      |
|            |           |           | Baxter   | 0.173  | 0.153        | 0.81         |       |       |      |
|            |           |           | Westonia | 0.011  | 0.479        | 0.32         |       |       |      |
