# Supplementary material for: Whole-Genome Analysis of Multienvironment or Multitrait QTL in MAGIC
Source: PubMed Central journal article supplement (PMC4169149; doi:10.1534/g3.114.012971), 2014-09-01
Supplement: supp_4.9.1569_TableS2.pdf [file supp_4.9.1569_TableS2.pdf]

**Table S2 MPWGAIM QTL analysis of thousand kernel weight**

| Chromosome | dist (cM) | dist (cM) | Founder  | Size   | Founder Prob | Founder LOGP | Prob  | % var | LOGP |
|------------|-----------|-----------|----------|--------|--------------|--------------|-------|-------|------|
| 2A         | 119.27    | 119.77    | Yitpi    | -0.463 | 0.117        | 0.93         | 0.002 | 1.5   | 2.72 |
|            |           |           | Chara    | 0.11   | 0.39         | 0.41         |       |       |      |
|            |           |           | Baxter   | -0.483 | 0.111        | 0.95         |       |       |      |
|            |           |           | Westonia | 0.744  | 0.028        | 1.55         |       |       |      |
| 2B         | 117.41    | 118.42    | Yitpi    | 1.084  | 0.069        | 1.16         | 0     | 4.7   | 5.33 |
|            |           |           | Chara    | -1.791 | 0.008        | 2.09         |       |       |      |
|            |           |           | Baxter   | -0.374 | 0.319        | 0.5          |       |       |      |
|            |           |           | Westonia | 0.67   | 0.197        | 0.71         |       |       |      |
| 2B         | 140.39    | 141.91    | Yitpi    | 1.341  | 0.042        | 1.38         | 0     | 5.6   | 5.63 |
|            |           |           | Chara    | -2.047 | 0.017        | 1.77         |       |       |      |
|            |           |           | Baxter   | 0.108  | 0.449        | 0.35         |       |       |      |
|            |           |           | Westonia | 0.083  | 0.465        | 0.33         |       |       |      |
| 2D         | 56.66     | 57.16     | Yitpi    | -0.682 | 0.054        | 1.27         | 0.004 | 1.6   | 2.4  |
|            |           |           | Chara    | 0.192  | 0.319        | 0.5          |       |       |      |
|            |           |           | Baxter   | -0.379 | 0.2          | 0.7          |       |       |      |
|            |           |           | Westonia | 0.759  | 0.04         | 1.4          |       |       |      |
| 2D         | 90.57     | 92.09     | Yitpi    | -0.414 | 0.187        | 0.73         | 0     | 2.3   | 3.68 |
|            |           |           | Chara    | 0.622  | 0.081        | 1.09         |       |       |      |
|            |           |           | Baxter   | 0.518  | 0.14         | 0.85         |       |       |      |
|            |           |           | Westonia | -0.863 | 0.032        | 1.5          |       |       |      |
| 2D         | 109.85    | 123.57    | Yitpi    | -0.32  | 0.317        | 0.5          | 0     | 5.3   | 4.66 |
|            |           |           | Chara    | 0.524  | 0.23         | 0.64         |       |       |      |
|            |           |           | Baxter   | -1.48  | 0.017        | 1.78         |       |       |      |
|            |           |           | Westonia | 0.975  | 0.059        | 1.23         |       |       |      |
| 2D         | 165.53    | 166.03    | Yitpi    | 0.392  | 0.264        | 0.58         | 0.015 | 2.6   | 1.82 |
|            |           |           | Chara    | -0.182 | 0.399        | 0.4          |       |       |      |
|            |           |           | Baxter   | -1.048 | 0.055        | 1.26         |       |       |      |
|            |           |           | Westonia | 0.652  | 0.105        | 0.98         |       |       |      |
| 3A         | 57.34     | 57.84     | Yitpi    | 0.599  | 0.04         | 1.4          | 0.024 | 0.8   | 1.61 |
|            |           |           | Chara    | 0.035  | 0.461        | 0.34         |       |       |      |
|            |           |           | Baxter   | -0.25  | 0.241        | 0.62         |       |       |      |
|            |           |           | Westonia | -0.447 | 0.1          | 1            |       |       |      |
| 3A         | 246.14    | 246.65    | Yitpi    | -0.062 | 0.437        | 0.36         | 0.003 | 1.4   | 2.51 |
|            |           |           | Chara    | -0.625 | 0.066        | 1.18         |       |       |      |
|            |           |           | Baxter   | -0.178 | 0.33         | 0.48         |       |       |      |
|            |           |           | Westonia | 0.771  | 0.027        | 1.57         |       |       |      |
| 3D         | 39.71     | 145.73    | Yitpi    | 1.888  | 0.046        | 1.34         | 0.005 | 14.2  | 2.34 |
|            |           |           | Chara    | -1.023 | 0.23         | 0.64         |       |       |      |
|            |           |           | Baxter   | 0.536  | 0.339        | 0.47         |       |       |      |
|            |           |           | Westonia | -2.384 | 0.048        | 1.32         |       |       |      |
| 5A         | 250.92    | 259.64    | Yitpi    | -0.825 | 0.023        | 1.64         | 0.001 | 1.7   | 2.95 |
|            |           |           | Chara    | -0.12  | 0.385        | 0.41         |       |       |      |
|            |           |           | Baxter   | 0.201  | 0.322        | 0.49         |       |       |      |
|            |           |           | Westonia | 0.641  | 0.054        | 1.26         |       |       |      |
| 5A         | 321.45    | 324.54    | Yitpi    | -0.522 | 0.138        | 0.86         | 0.001 | 2.6   | 3.15 |
|            |           |           | Chara    | 0.045  | 0.467        | 0.33         |       |       |      |
|            |           |           | Baxter   | -0.734 | 0.096        | 1.02         |       |       |      |
|            |           |           | Westonia | 1.042  | 0.02         | 1.69         |       |       |      |
| 5B         | 54.97     | 55.98     | Yitpi    | -0.711 | 0.034        | 1.47         | 0.003 | 1.3   | 2.53 |
|            |           |           | Chara    | -0.109 | 0.389        | 0.41         |       |       |      |
|            |           |           | Baxter   | 0.713  | 0.036        | 1.45         |       |       |      |
|            |           |           | Westonia | 0.015  | 0.484        | 0.31         |       |       |      |
| 5B         | 360.69    | 361.19    | Yitpi    | 0.93   | 0.016        | 1.8          | 0     | 1.7   | 3.5  |
|            |           |           | Chara    | -0.449 | 0.21         | 0.68         |       |       |      |
|            |           |           | Baxter   | -0.428 | 0.176        | 0.75         |       |       |      |
|            |           |           | Westonia | -0.177 | 0.346        | 0.46         |       |       |      |
| 6B         | 298.64    | 299.15    | Yitpi    | -0.092 | 0.397        | 0.4          | 0.007 | 1.1   | 2.18 |
|            |           |           | Chara    | 0.289  | 0.229        | 0.64         |       |       |      |
|            |           |           | Baxter   | 0.427  | 0.115        | 0.94         |       |       |      |
|            |           |           | Westonia | -0.697 | 0.024        | 1.61         |       |       |      |
| 7A         | 286.39    | 287.4     | Yitpi    | -0.16  | 0.357        | 0.45         | 0     | 1.9   | 3.61 |
|            |           |           | Chara    | 0.001  | 0.499        | 0.3          |       |       |      |
|            |           |           | Baxter   | -0.845 | 0.028        | 1.56         |       |       |      |
|            |           |           | Westonia | 0.876  | 0.024        | 1.61         |       |       |      |
| 7B         | 58.9      | 59.4      | Yitpi    | 0.698  | 0.028        | 1.56         | 0.005 | 1.2   | 2.34 |
|            |           |           | Chara    | -0.586 | 0.059        | 1.23         |       |       |      |
|            |           |           | Baxter   | -0.056 | 0.441        | 0.36         |       |       |      |
|            |           |           | Westonia | -0.135 | 0.355        | 0.45         |       |       |      |
| Unlinked3  | 2.02      | 4.06      | Yitpi    | -0.364 | 0.132        | 0.88         | 0.167 | 0.5   | 0.78 |
|            |           |           | Chara    | 0.01   | 0.49         | 0.31         |       |       |      |
|            |           |           | Baxter   | 0.39   | 0.12         | 0.92         |       |       |      |
|            |           |           | Westonia | -0.083 | 0.421        | 0.38         |       |       |      |
