# Supplementary material for: Whole-Genome Analysis of Multienvironment or Multitrait QTL in MAGIC
Source: PubMed Central journal article supplement (PMC4169149; doi:10.1534/g3.114.012971), 2014-09-01
Supplement: supp_4.9.1569_TableS3.pdf [file supp_4.9.1569_TableS3.pdf]

**Table S3 MPWGAIM analysis of flowering time for the Leeton Site**

| Chromosome | Left dist (cM) | Right dist (cM) | Founder  | Size   | Founder Prob | Founder LOGP | Prob  | % var | LOGP  |
|------------|----------------|-----------------|----------|--------|--------------|--------------|-------|-------|-------|
| 2B         | 81.39          | 81.9            | Yitpi    | -0.58  | 0.192        | 0.72         | 0.001 | 1.3   | 2.9   |
|            |                |                 | Chara    | -1.171 | 0.062        | 1.21         |       |       |       |
|            |                |                 | Baxter   | 0.357  | 0.308        | 0.51         |       |       |       |
|            |                |                 | Westonia | 1.27   | 0.03         | 1.52         |       |       |       |
| 2D         | 7.35           | 31.25           | Yitpi    | -4.648 | 0.004        | 2.42         | 0     | 49.5  | 52.66 |
|            |                |                 | Chara    | 4.068  | 0.017        | 1.78         |       |       |       |
|            |                |                 | Baxter   | -6.409 | 0            | 3.73         |       |       |       |
|            |                |                 | Westonia | 4.438  | 0.007        | 2.16         |       |       |       |
| 2D         | 56.66          | 57.16           | Yitpi    | -1.262 | 0.015        | 1.83         | 0.002 | 1.1   | 2.69  |
|            |                |                 | Chara    | 0.63   | 0.136        | 0.86         |       |       |       |
|            |                |                 | Baxter   | 0.49   | 0.212        | 0.67         |       |       |       |
|            |                |                 | Westonia | 0.058  | 0.462        | 0.34         |       |       |       |
| 2D         | 136.19         | 137.2           | Yitpi    | 0.557  | 0.147        | 0.83         | 0.007 | 0.8   | 2.17  |
|            |                |                 | Chara    | 0.292  | 0.3          | 0.52         |       |       |       |
|            |                |                 | Baxter   | -1.05  | 0.019        | 1.72         |       |       |       |
|            |                |                 | Westonia | 0.142  | 0.389        | 0.41         |       |       |       |
| 3D         | 39.71          | 145.73          | Yitpi    | 2.352  | 0.07         | 1.16         | 0.012 | 9.7   | 1.93  |
|            |                |                 | Chara    | -1.292 | 0.253        | 0.6          |       |       |       |
|            |                |                 | Baxter   | 1.358  | 0.228        | 0.64         |       |       |       |
|            |                |                 | Westonia | -3.161 | 0.057        | 1.25         |       |       |       |
| 4B         | 96.06          | 96.56           | Yitpi    | 0.136  | 0.41         | 0.39         | 0     | 1.5   | 4.09  |
|            |                |                 | Chara    | 0.412  | 0.264        | 0.58         |       |       |       |
|            |                |                 | Baxter   | 0.805  | 0.098        | 1.01         |       |       |       |
|            |                |                 | Westonia | -1.456 | 0.009        | 2.05         |       |       |       |
| 5A         | 310.18         | 310.68          | Yitpi    | -0.39  | 0.204        | 0.69         | 0.013 | 0.7   | 1.9   |
|            |                |                 | Chara    | 0.166  | 0.367        | 0.44         |       |       |       |
|            |                |                 | Baxter   | -0.669 | 0.093        | 1.03         |       |       |       |
|            |                |                 | Westonia | 0.841  | 0.038        | 1.42         |       |       |       |
| 5B         | 240.97         | 241.47          | Yitpi    | 0.646  | 0.1          | 1            | 0.003 | 0.8   | 2.47  |
|            |                |                 | Chara    | -1.066 | 0.019        | 1.72         |       |       |       |
|            |                |                 | Baxter   | 0.313  | 0.28         | 0.55         |       |       |       |
|            |                |                 | Westonia | 0.044  | 0.468        | 0.33         |       |       |       |
| 6B         | 149.9          | 162.33          | Yitpi    | -0.986 | 0.099        | 1.01         | 0     | 2.1   | 4.37  |
|            |                |                 | Chara    | -1.128 | 0.079        | 1.1          |       |       |       |
|            |                |                 | Baxter   | 0.588  | 0.211        | 0.68         |       |       |       |
|            |                |                 | Westonia | 1.371  | 0.029        | 1.54         |       |       |       |
| 7A         | 125.93         | 129.56          | Yitpi    | 0.829  | 0.059        | 1.23         | 0.003 | 1     | 2.47  |
|            |                |                 | Chara    | -0.457 | 0.194        | 0.71         |       |       |       |
|            |                |                 | Baxter   | -0.88  | 0.048        | 1.32         |       |       |       |
|            |                |                 | Westonia | 0.44   | 0.205        | 0.69         |       |       |       |
| 7B         | 44.37          | 44.88           | Yitpi    | -0.166 | 0.37         | 0.43         | 0.006 | 0.8   | 2.21  |
|            |                |                 | Chara    | -0.92  | 0.029        | 1.54         |       |       |       |
|            |                |                 | Baxter   | 0.389  | 0.221        | 0.66         |       |       |       |
|            |                |                 | Westonia | 0.642  | 0.092        | 1.04         |       |       |       |
