# Supplementary material for: Whole-Genome Analysis of Multienvironment or Multitrait QTL in MAGIC
Source: PubMed Central journal article supplement (PMC4169149; doi:10.1534/g3.114.012971), 2014-09-01
Supplement: supp_4.9.1569_TableS4.pdf [file supp_4.9.1569_TableS4.pdf]

**Table S4 MPWGAIM analysis of flowering time for the Temora Site**

| Chromosome | Left dist (cM) | Right dist (cM) | Founder  | Size   | Founder Prob | Founder LOGP | Prob  | % var | LOGP  |
|------------|----------------|-----------------|----------|--------|--------------|--------------|-------|-------|-------|
| 2D         | 7.35           | 31.25           | Yitpi    | -2.931 | 0.008        | 2.12         | 0     | 49.3  | 40.64 |
|            |                |                 | Chara    | 3.121  | 0.013        | 1.88         |       |       |       |
|            |                |                 | Baxter   | -5.384 | 0            | 4.9          |       |       |       |
|            |                |                 | Westonia | 3.767  | 0.002        | 2.77         |       |       |       |
| 2D         | 56.66          | 57.16           | Yitpi    | -1.702 | 0.005        | 2.32         | 0     | 2.9   | 5.79  |
|            |                |                 | Chara    | 0.744  | 0.126        | 0.9          |       |       |       |
|            |                |                 | Baxter   | 0.604  | 0.19         | 0.72         |       |       |       |
|            |                |                 | Westonia | 0.236  | 0.365        | 0.44         |       |       |       |
| 2D         | 137.2          | 138.21          | Yitpi    | 0.481  | 0.167        | 0.78         | 0.003 | 1.1   | 2.48  |
|            |                |                 | Chara    | 0.423  | 0.208        | 0.68         |       |       |       |
|            |                |                 | Baxter   | -0.999 | 0.017        | 1.76         |       |       |       |
|            |                |                 | Westonia | 0.044  | 0.462        | 0.34         |       |       |       |
| 5D         | 64.86          | 68.49           | Yitpi    | -0.236 | 0.318        | 0.5          | 0.001 | 1.4   | 3.3   |
|            |                |                 | Chara    | -0.694 | 0.08         | 1.1          |       |       |       |
|            |                |                 | Baxter   | 1.019  | 0.015        | 1.83         |       |       |       |
|            |                |                 | Westonia | -0.143 | 0.386        | 0.41         |       |       |       |
| 6B         | 162.33         | 163.85          | Yitpi    | -0.975 | 0.034        | 1.47         | 0.001 | 1.6   | 3.03  |
|            |                |                 | Chara    | -0.201 | 0.372        | 0.43         |       |       |       |
|            |                |                 | Baxter   | 0.201  | 0.356        | 0.45         |       |       |       |
|            |                |                 | Westonia | 0.911  | 0.039        | 1.41         |       |       |       |
| 6D         | 140.01         | 151.17          | Yitpi    | 0.506  | 0.184        | 0.73         | 0.012 | 1     | 1.91  |
|            |                |                 | Chara    | -0.841 | 0.028        | 1.55         |       |       |       |
|            |                |                 | Baxter   | 0.191  | 0.342        | 0.47         |       |       |       |
|            |                |                 | Westonia | 0.1    | 0.434        | 0.36         |       |       |       |
| 7A         | 125.93         | 129.56          | Yitpi    | 1.371  | 0.011        | 1.94         | 0     | 2.5   | 5.28  |
|            |                |                 | Chara    | -0.833 | 0.083        | 1.08         |       |       |       |
|            |                |                 | Baxter   | -0.776 | 0.098        | 1.01         |       |       |       |
|            |                |                 | Westonia | 0.14   | 0.408        | 0.39         |       |       |       |
| 7D         | 111.1          | 111.6           | Yitpi    | -0.098 | 0.415        | 0.38         | 0.059 | 0.6   | 1.23  |
|            |                |                 | Chara    | -0.702 | 0.044        | 1.36         |       |       |       |
|            |                |                 | Baxter   | 0.455  | 0.14         | 0.85         |       |       |       |
|            |                |                 | Westonia | 0.313  | 0.246        | 0.61         |       |       |       |
