# Supplementary material for: Whole-Genome Analysis of Multienvironment or Multitrait QTL in MAGIC
Source: PubMed Central journal article supplement (PMC4169149; doi:10.1534/g3.114.012971), 2014-09-01
Supplement: supp_4.9.1569_TableS5.pdf [file supp_4.9.1569_TableS5.pdf]

**Table S5 MPWGAIM analysis of flowering time for the Yanco Site**

| Chromosome | Left dist (cM) | Right dist (cM) | Founder  | Size   | Founder Prob | Founder LOGP | Prob  | % var | LOGP  |
|------------|----------------|-----------------|----------|--------|--------------|--------------|-------|-------|-------|
| 2A         | 26.48          | 26.98           | Yitpi    | -0.332 | 0.224        | 0.65         | 0.077 | 0.3   | 1.11  |
|            |                |                 | Chara    | 0.034  | 0.472        | 0.33         |       |       |       |
|            |                |                 | Baxter   | -0.345 | 0.216        | 0.67         |       |       |       |
|            |                |                 | Westonia | 0.608  | 0.062        | 1.21         |       |       |       |
| 2B         | 82.4           | 88.23           | Yitpi    | -0.512 | 0.297        | 0.53         | 0     | 2.9   | 5.75  |
|            |                |                 | Chara    | -2.372 | 0.012        | 1.94         |       |       |       |
|            |                |                 | Baxter   | 0.885  | 0.186        | 0.73         |       |       |       |
|            |                |                 | Westonia | 1.656  | 0.043        | 1.36         |       |       |       |
| 2D         | 7.35           | 31.25           | Yitpi    | -4.902 | 0.003        | 2.5          | 0     | 60    | 82.48 |
|            |                |                 | Chara    | 4.4    | 0.012        | 1.93         |       |       |       |
|            |                |                 | Baxter   | -9.16  | 0            | 6.42         |       |       |       |
|            |                |                 | Westonia | 5.304  | 0.002        | 2.68         |       |       |       |
| 2D         | 56.66          | 57.16           | Yitpi    | -1.121 | 0.022        | 1.66         | 0.003 | 0.8   | 2.48  |
|            |                |                 | Chara    | 0.716  | 0.096        | 1.02         |       |       |       |
|            |                |                 | Baxter   | 0.447  | 0.222        | 0.65         |       |       |       |
|            |                |                 | Westonia | -0.127 | 0.415        | 0.38         |       |       |       |
| 3D         | 149.76         | 151.28          | Yitpi    | 0.838  | 0.081        | 1.09         | 0.036 | 0.4   | 1.44  |
|            |                |                 | Chara    | -0.294 | 0.385        | 0.41         |       |       |       |
|            |                |                 | Baxter   | -0.299 | 0.383        | 0.42         |       |       |       |
|            |                |                 | Westonia | -0.358 | 0.361        | 0.44         |       |       |       |
| 4B         | 75.62          | 77.66           | Yitpi    | -0.28  | 0.271        | 0.57         | 0.011 | 0.5   | 1.95  |
|            |                |                 | Chara    | 0.495  | 0.158        | 0.8          |       |       |       |
|            |                |                 | Baxter   | 0.553  | 0.128        | 0.89         |       |       |       |
|            |                |                 | Westonia | -0.825 | 0.038        | 1.42         |       |       |       |
| 5A         | 199.63         | 203.26          | Yitpi    | -0.612 | 0.118        | 0.93         | 0.002 | 0.7   | 2.77  |
|            |                |                 | Chara    | 0.962  | 0.027        | 1.57         |       |       |       |
|            |                |                 | Baxter   | -0.597 | 0.136        | 0.87         |       |       |       |
|            |                |                 | Westonia | 0.176  | 0.363        | 0.44         |       |       |       |
| 5B         | 240.97         | 241.47          | Yitpi    | 0.292  | 0.312        | 0.51         | 0     | 1     | 3.86  |
|            |                |                 | Chara    | -1.336 | 0.013        | 1.87         |       |       |       |
|            |                |                 | Baxter   | -0.063 | 0.46         | 0.34         |       |       |       |
|            |                |                 | Westonia | 0.994  | 0.058        | 1.24         |       |       |       |
| 5D         | 64.86          | 68.49           | Yitpi    | -0.537 | 0.208        | 0.68         | 0     | 1.6   | 6.2   |
|            |                |                 | Chara    | -0.882 | 0.089        | 1.05         |       |       |       |
|            |                |                 | Baxter   | 1.534  | 0.007        | 2.13         |       |       |       |
|            |                |                 | Westonia | -0.248 | 0.352        | 0.45         |       |       |       |
| 6B         | 35.09          | 35.59           | Yitpi    | -0.127 | 0.379        | 0.42         | 0.101 | 0.3   | 0.99  |
|            |                |                 | Chara    | -0.47  | 0.119        | 0.92         |       |       |       |
|            |                |                 | Baxter   | 0.503  | 0.088        | 1.05         |       |       |       |
|            |                |                 | Westonia | 0.062  | 0.449        | 0.35         |       |       |       |
| 6B         | 162.33         | 163.85          | Yitpi    | -0.647 | 0.151        | 0.82         | 0.001 | 1     | 2.96  |
|            |                |                 | Chara    | -0.951 | 0.094        | 1.03         |       |       |       |
|            |                |                 | Baxter   | 0.33   | 0.304        | 0.52         |       |       |       |
|            |                |                 | Westonia | 1.153  | 0.029        | 1.53         |       |       |       |
| 7A         | 129.56         | 138.28          | Yitpi    | 1.854  | 0.007        | 2.13         | 0     | 2.1   | 7.03  |
|            |                |                 | Chara    | -0.878 | 0.123        | 0.91         |       |       |       |
|            |                |                 | Baxter   | -1.08  | 0.079        | 1.1          |       |       |       |
|            |                |                 | Westonia | -0.094 | 0.452        | 0.35         |       |       |       |
| 7B         | 101.37         | 102.38          | Yitpi    | 0.808  | 0.039        | 1.41         | 0.032 | 0.4   | 1.5   |
|            |                |                 | Chara    | -0.257 | 0.329        | 0.48         |       |       |       |
|            |                |                 | Baxter   | -0.07  | 0.445        | 0.35         |       |       |       |
|            |                |                 | Westonia | -0.534 | 0.125        | 0.9          |       |       |       |
| Unlinked1  | 5.08           | 5.58            | Yitpi    | 0.568  | 0.302        | 0.52         | 0.01  | 0.6   | 2.01  |
|            |                |                 | Chara    | -0.649 | 0.277        | 0.56         |       |       |       |
|            |                |                 | Baxter   | 0.568  | 0.302        | 0.52         |       |       |       |
|            |                |                 | Westonia | -0.649 | 0.277        | 0.56         |       |       |       |
